# Supplementary figures and images for: Nanogel hybrid assembly for exosome intracellular delivery: effects on endocytosis and fusion by exosome surface polymer engineering
Source: Royal Society of Chemistry journal article supplement (doi:10.1039/c9bm01232j), 2019-11-27

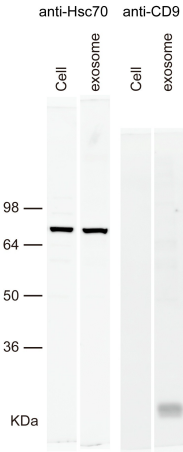

Supplement: c9bm01232j2.pdf [file c9bm01232j2.pdf]

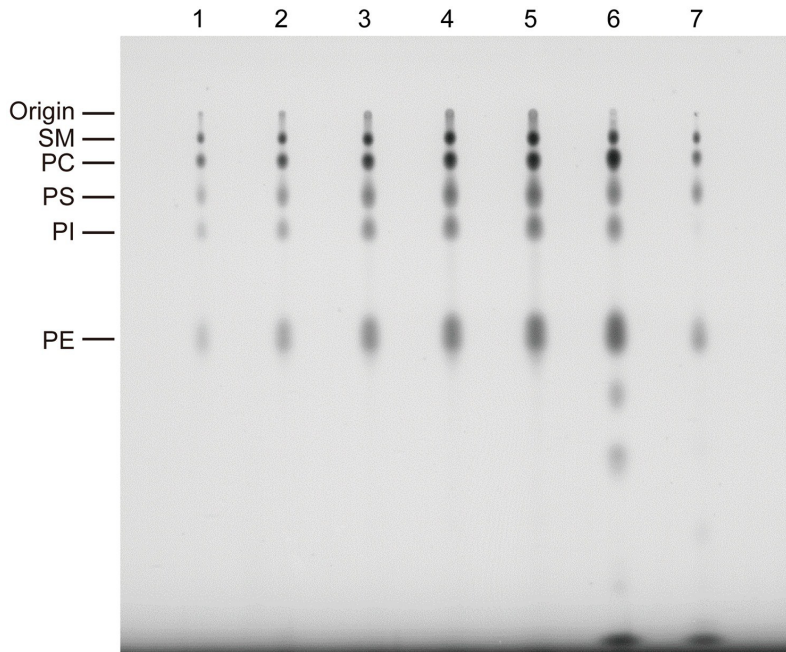

Supplement: c9bm01232j3.pdf [file c9bm01232j3.pdf]

|     | 1 | 2 | 3 | 4 | 5 | 6 |
|-----|---|---|---|---|---|---|
| PVS |   | - |   |   | + |   |

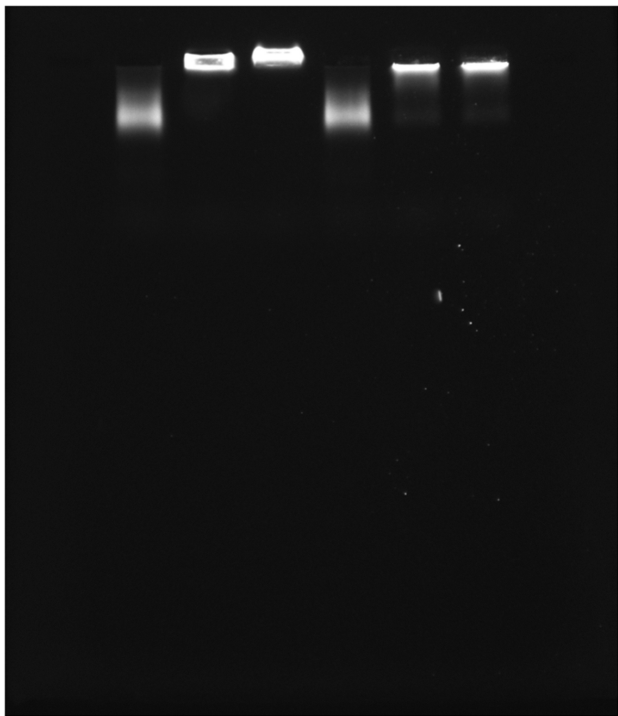

Supplement: c9bm01232j4.pdf [file c9bm01232j4.pdf]

**a**

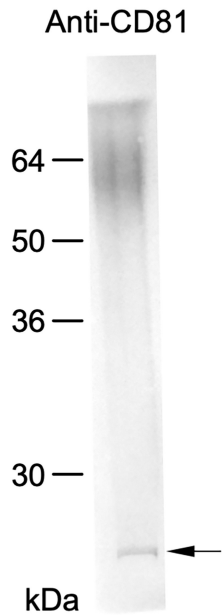

**b**

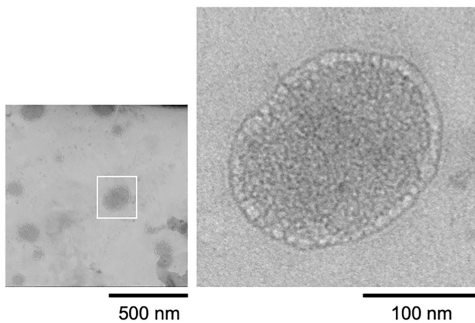

**c**

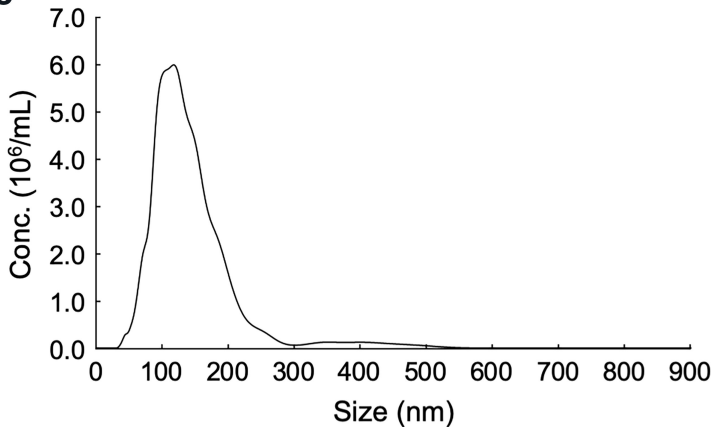

Supplement: c9bm01232j5.pdf [file c9bm01232j5.pdf]
